# Supplementary material
Source: publisher figshare collection journal article supplement (https://future-science-group.figshare.com/articles/dataset/_/22141268)

## Support information

### Novel anthraquinone derivatives trigger ER stress response and induce apoptosis

#### Content:

#### <sup>1</sup>H NMR, <sup>13</sup>C NMR and HRMS

#### 1,8-di(benzyloxy)-9,10-anthraquinone-N-(2-aminoethyl)-3-carboxamide (KA-4a)

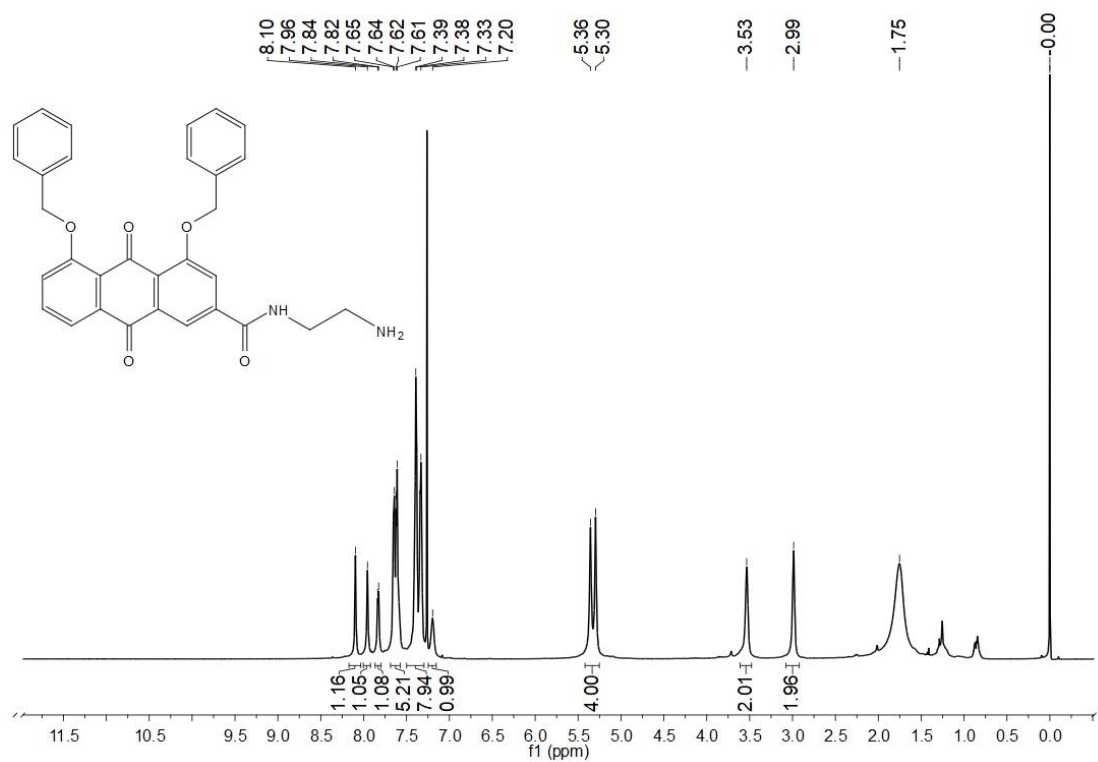

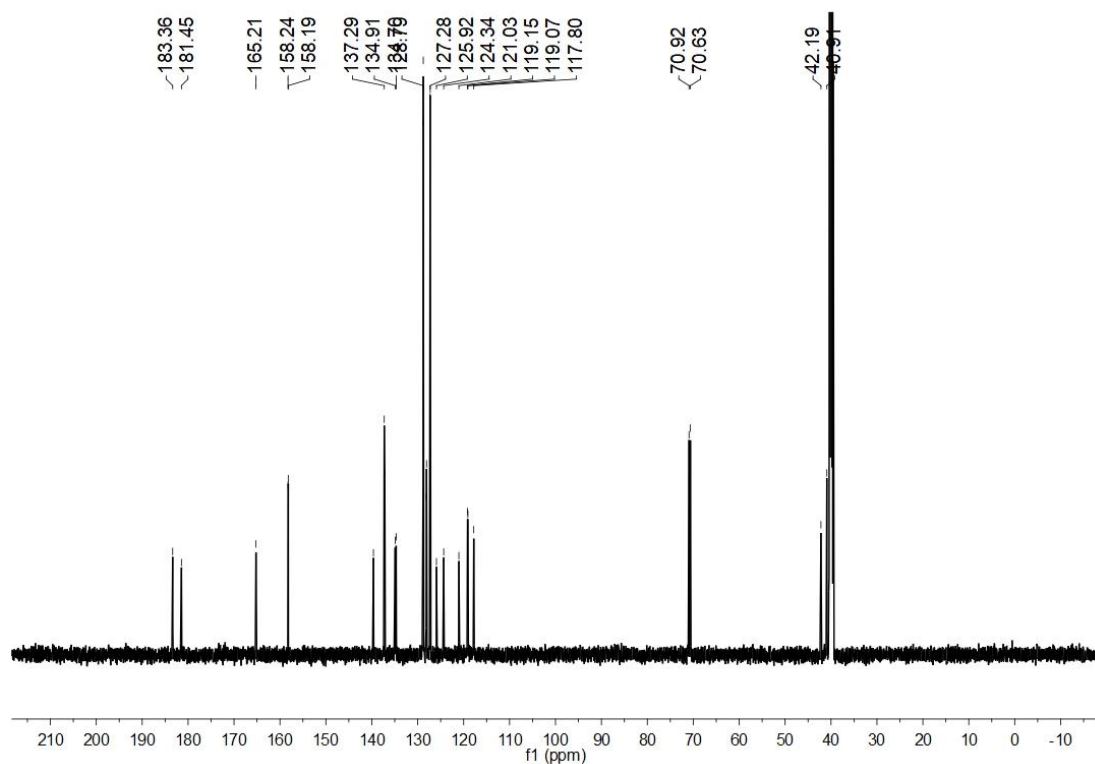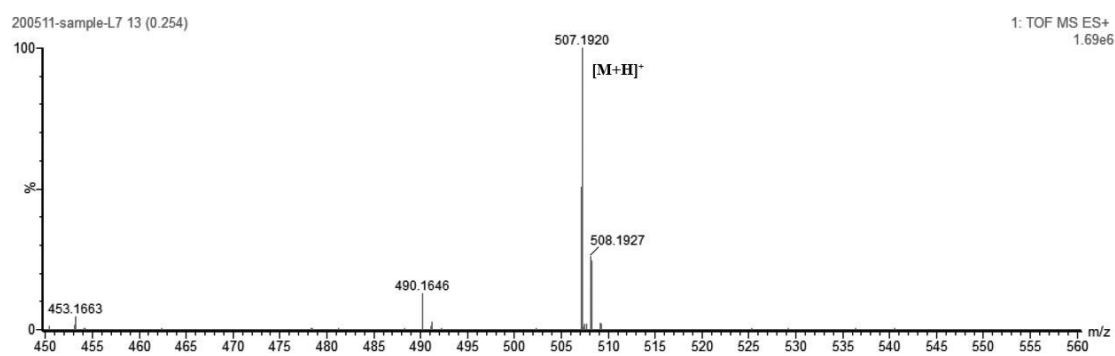

**1,8-di(benzyloxy)-9,10-anthraquinone-N-(2-(dimethylamino)ethyl)-3-carboxamide (KA-4b)**

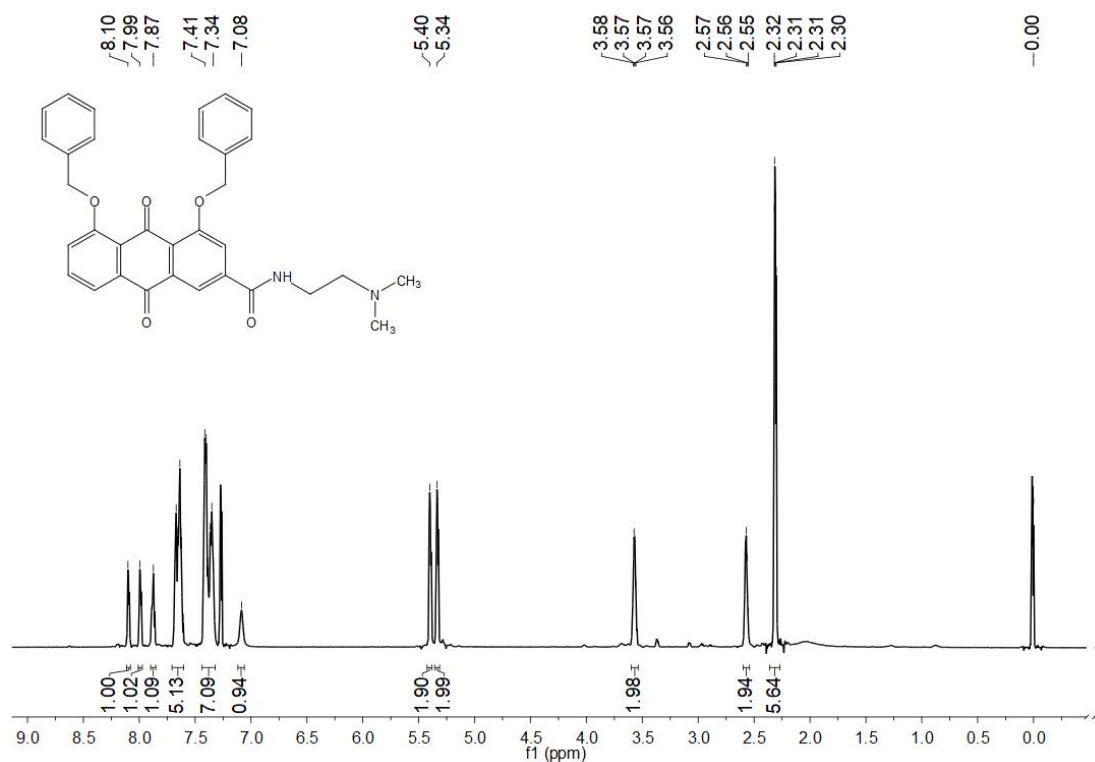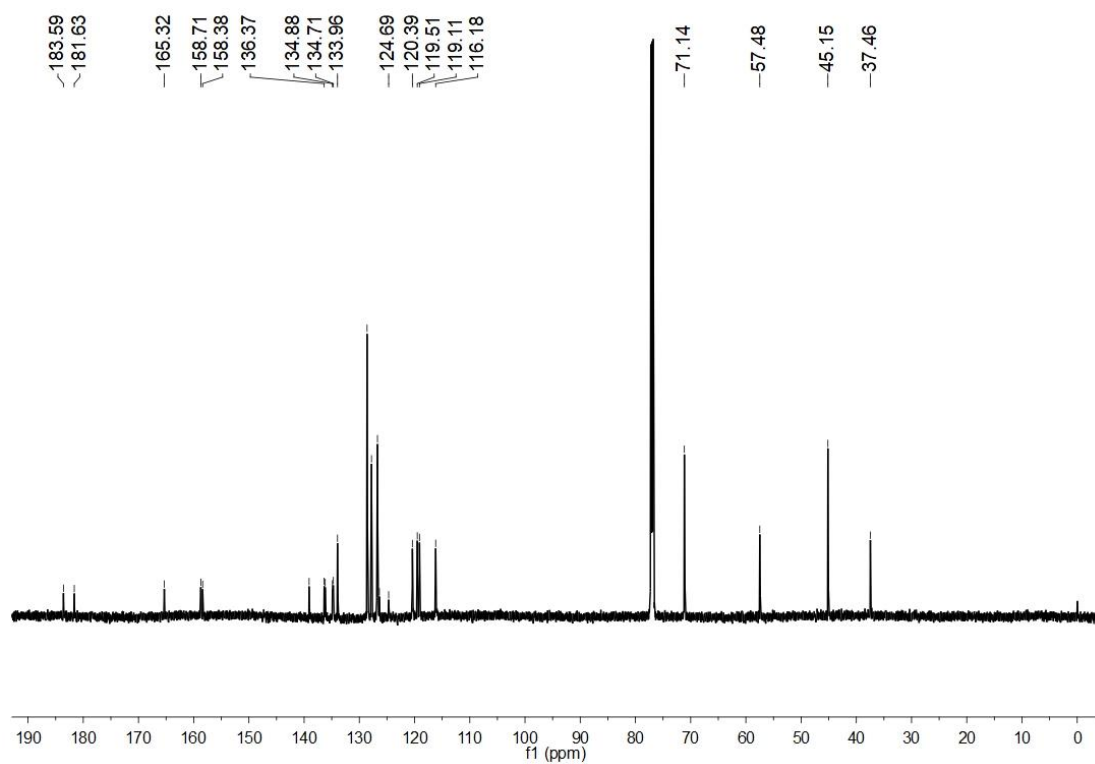

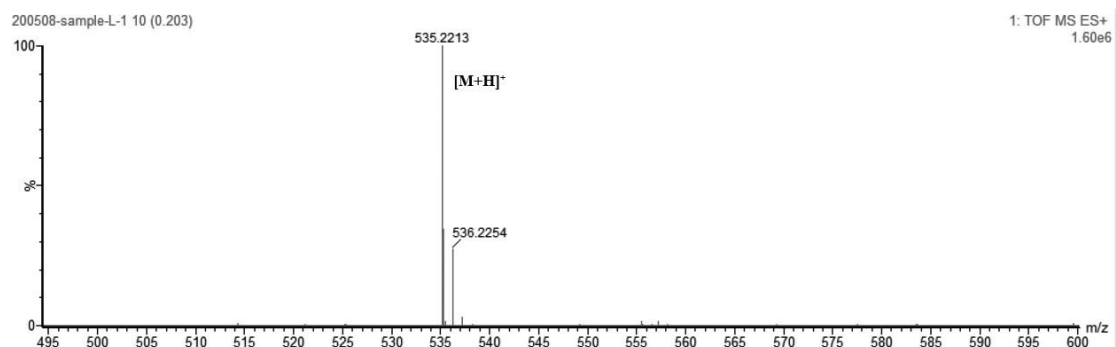

**1,8-di(benzyloxy)-9,10-anthraquinone-N-(2-(diethylamino)ethyl)-3-carboxamide (KA-4c)**

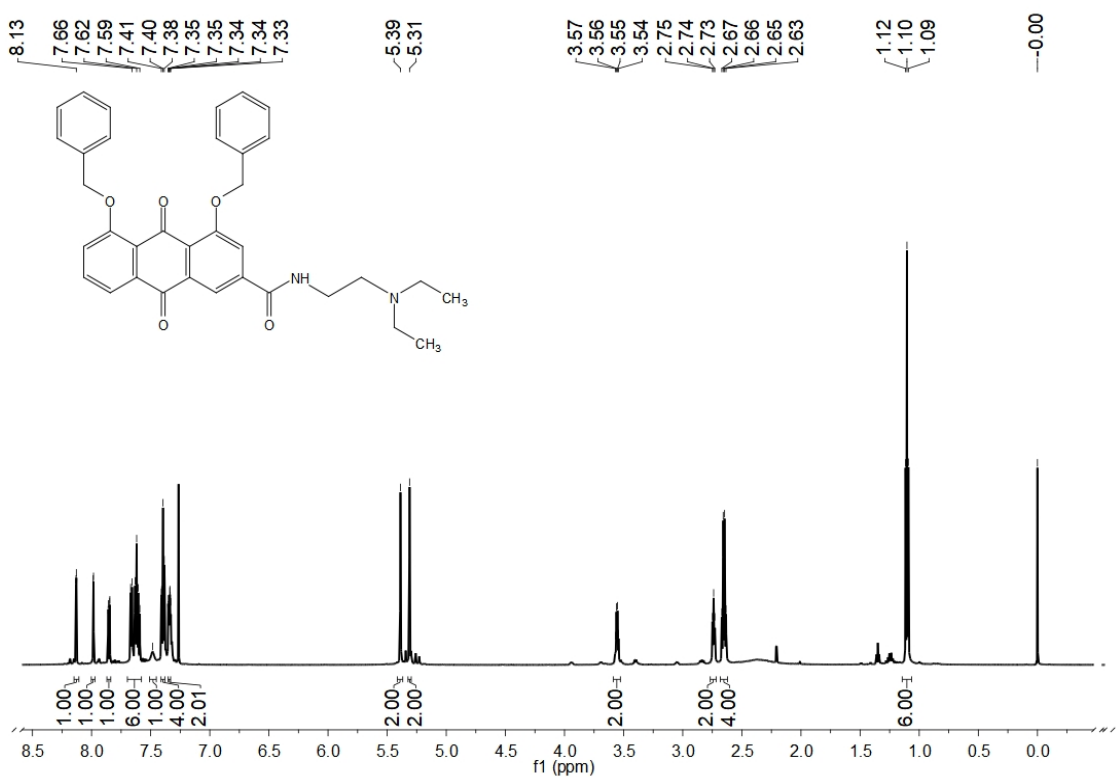

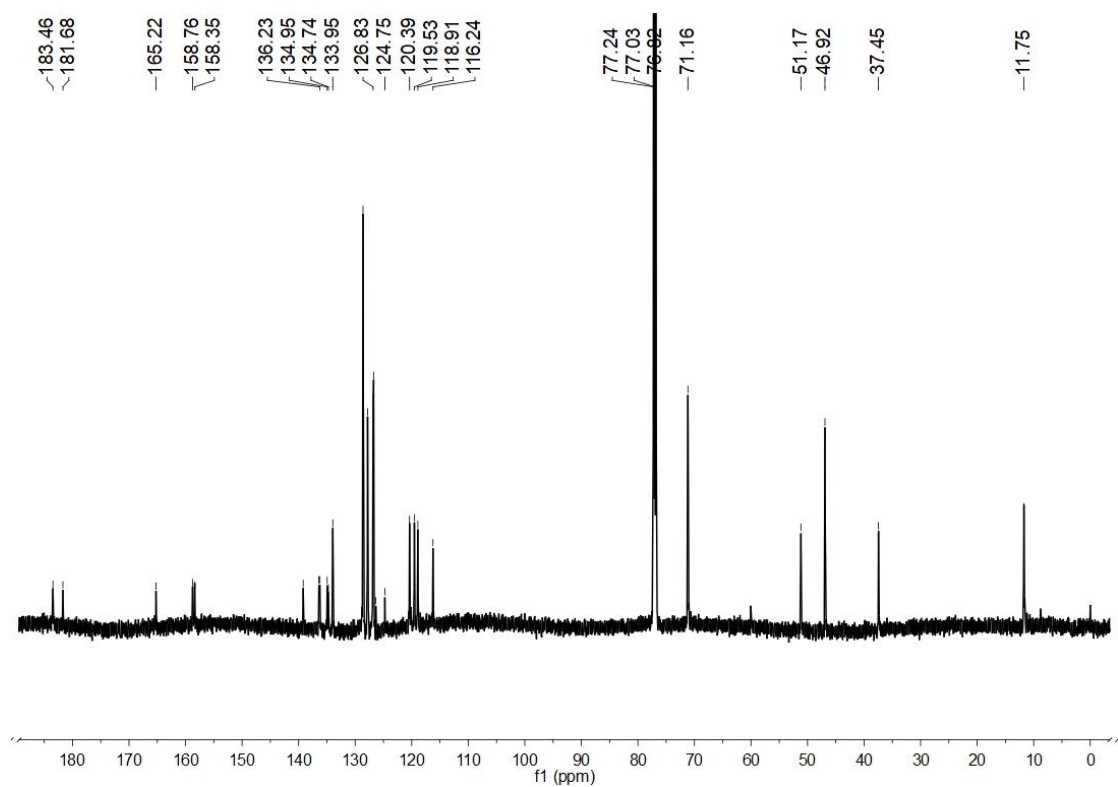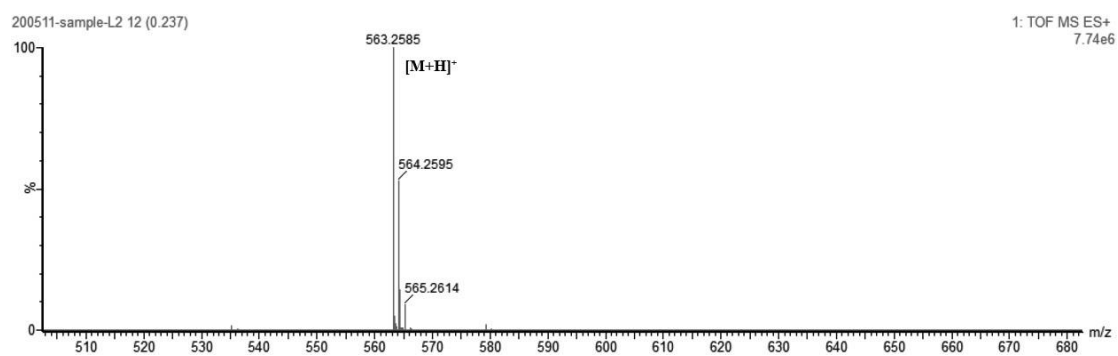

**1,8-di(benzyloxy)-9,10-anthraquinone-N-(2-(pyrrolidin-1-yl)ethyl)-3-carboxamide (KA-4d)**

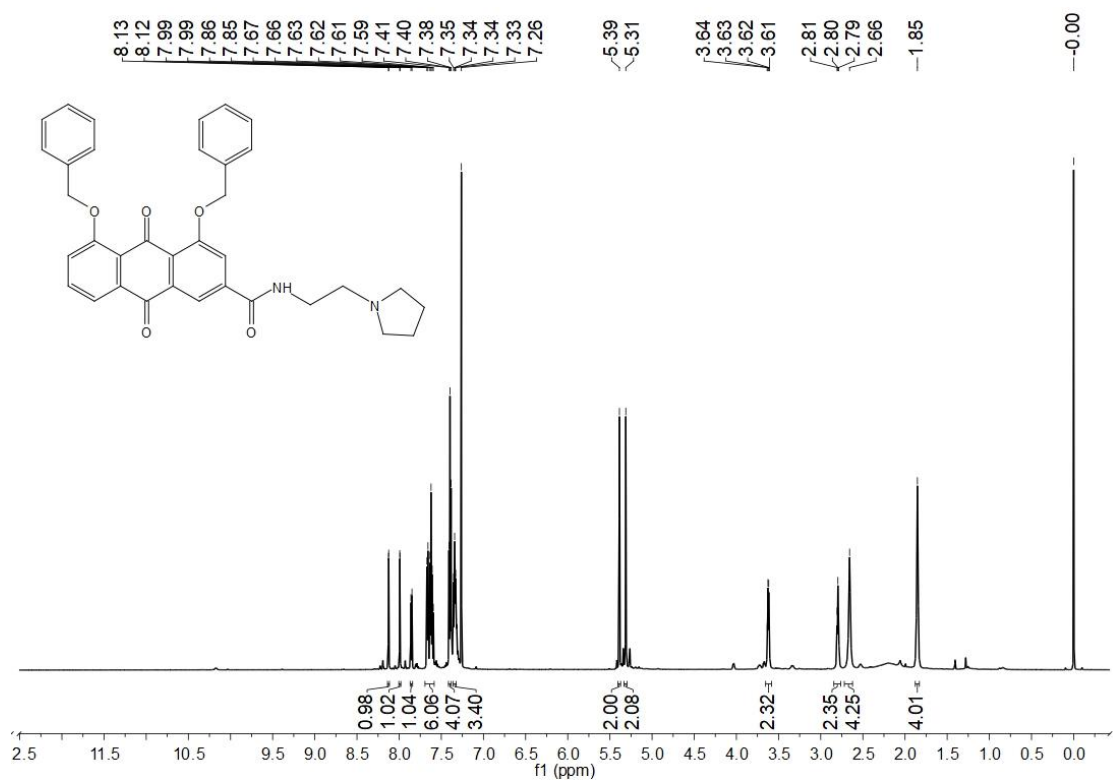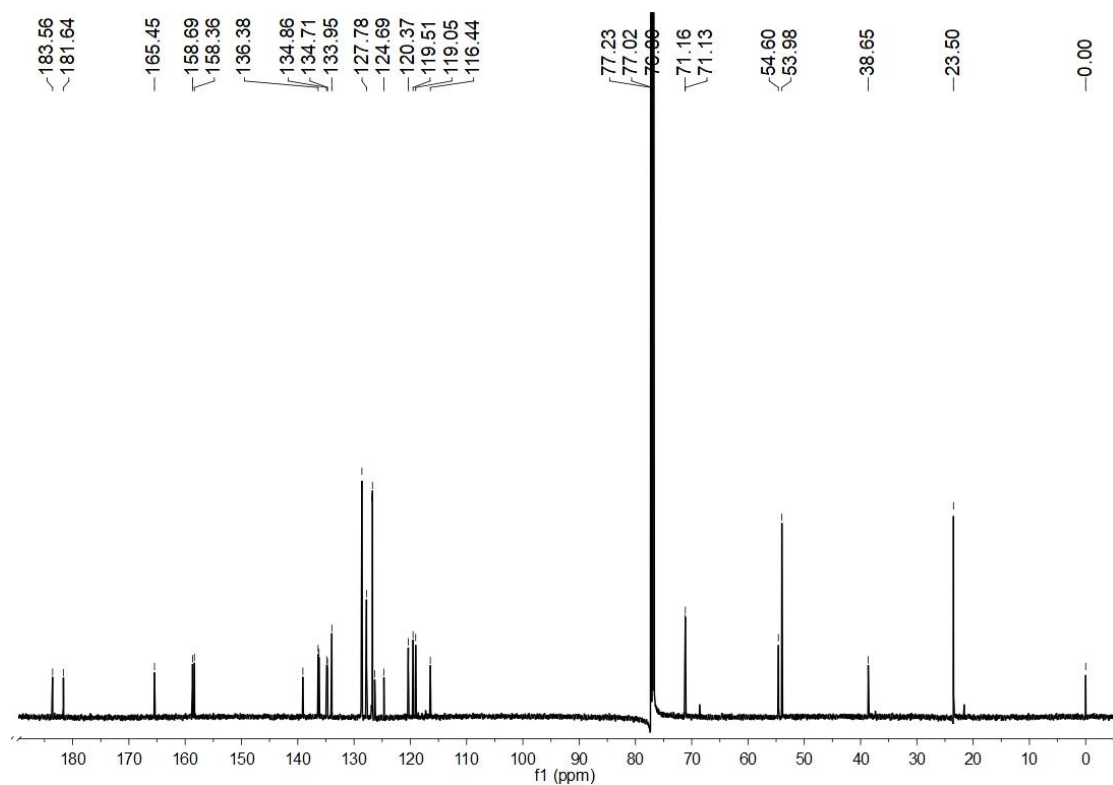

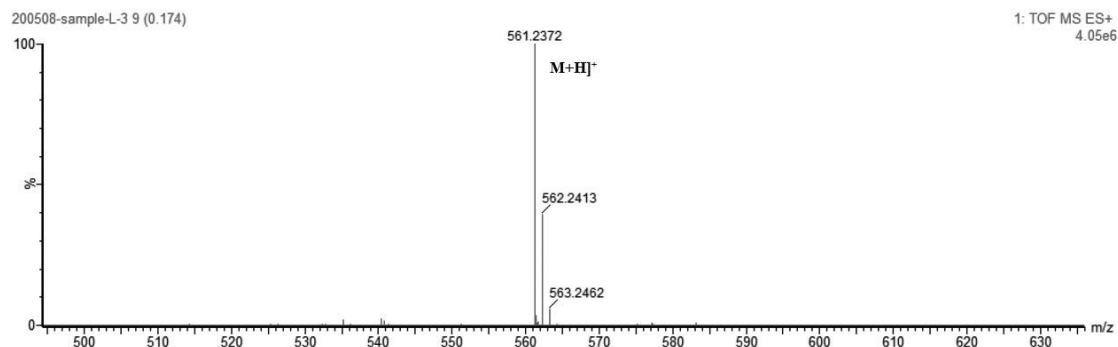

**1,8-di(benzyloxy)-9,10-anthraquinone-N-(2-morpholinoethyl)-3-carboxamide (KA-4e)**

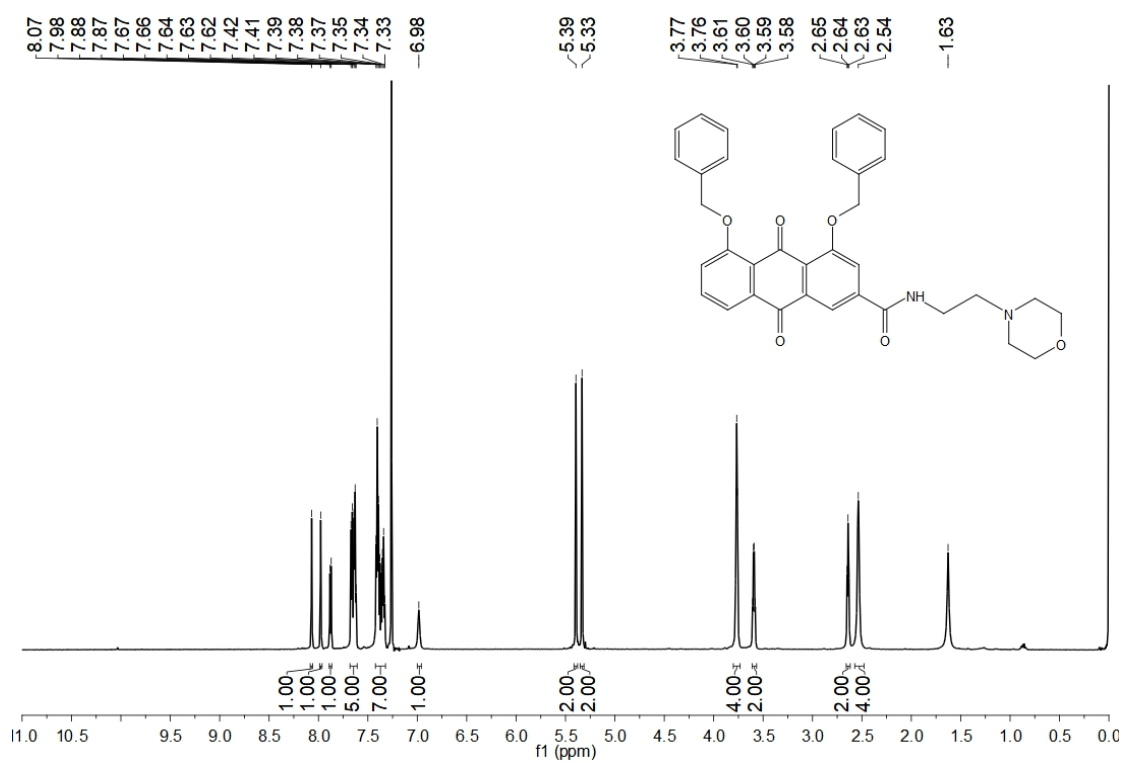

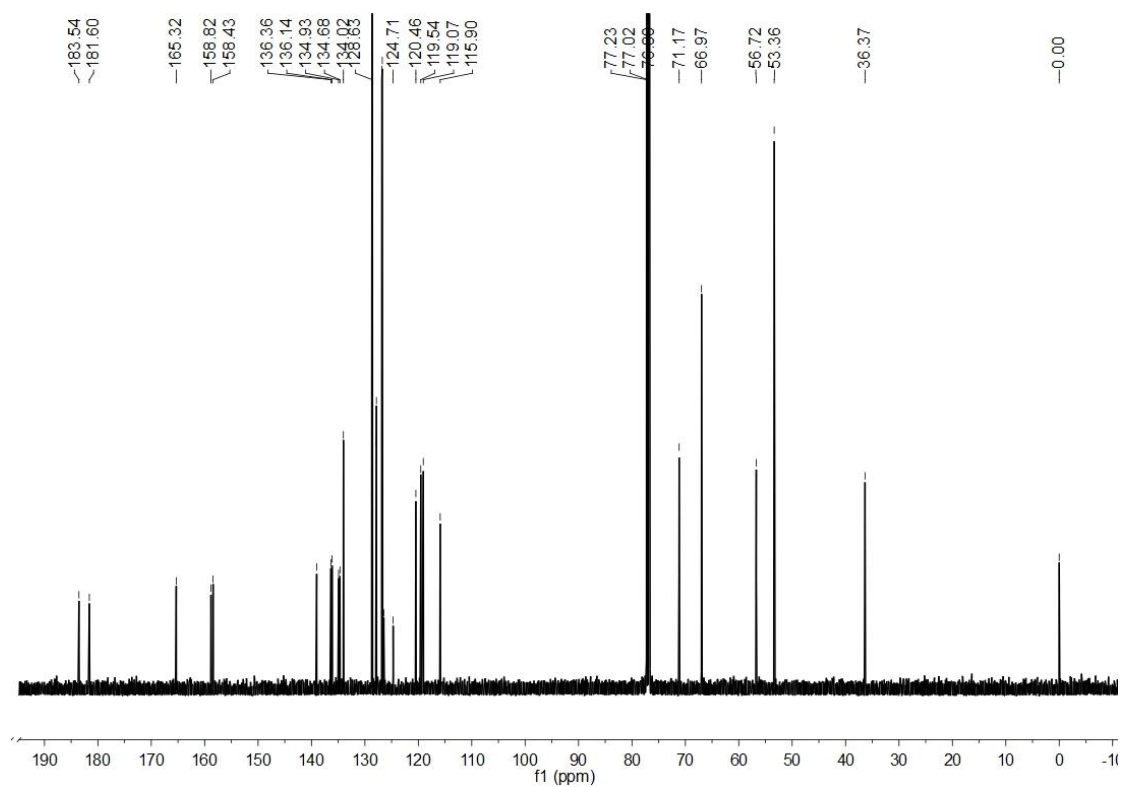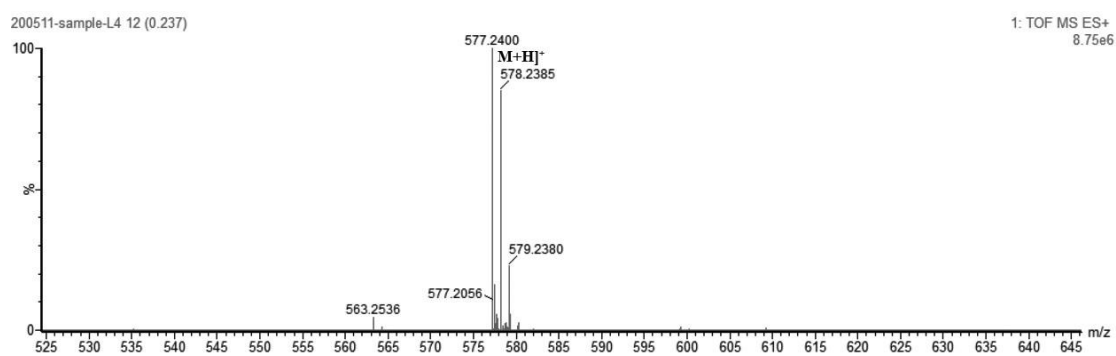

**1,8-dibenzoxyl-9,10-anthraquinone-N-methyl-N-[2-(dimethylamide)ethyl]-3-carboxamide(KA-4h)**



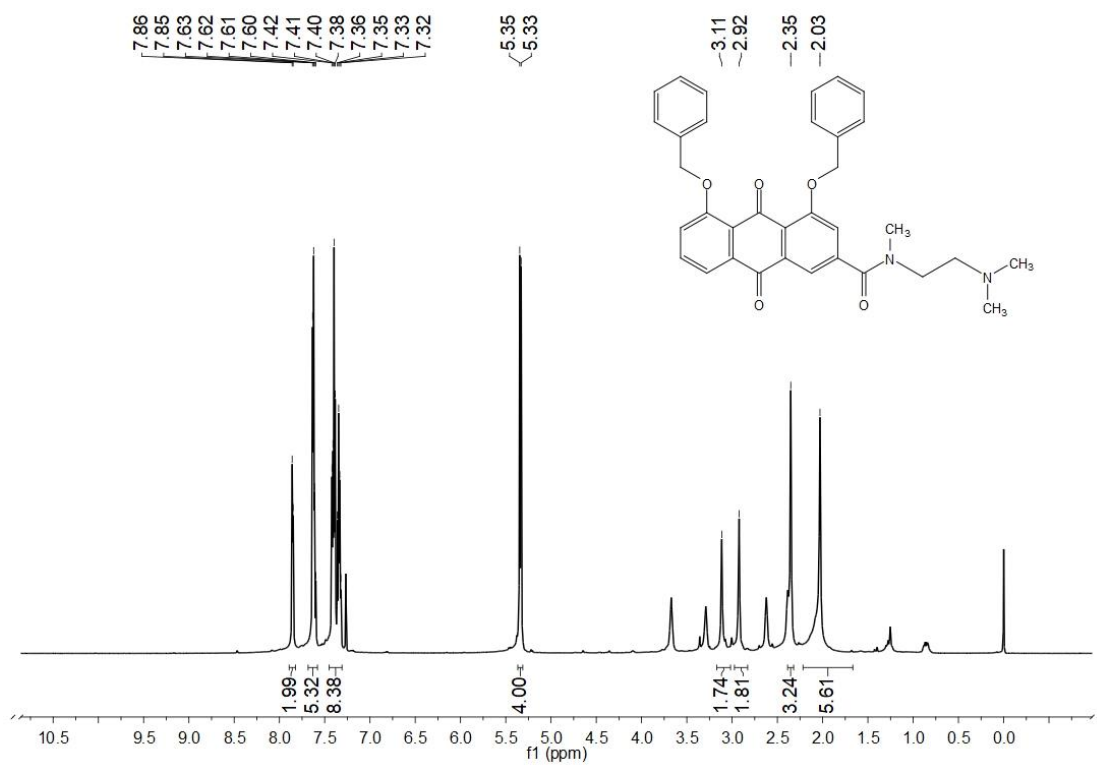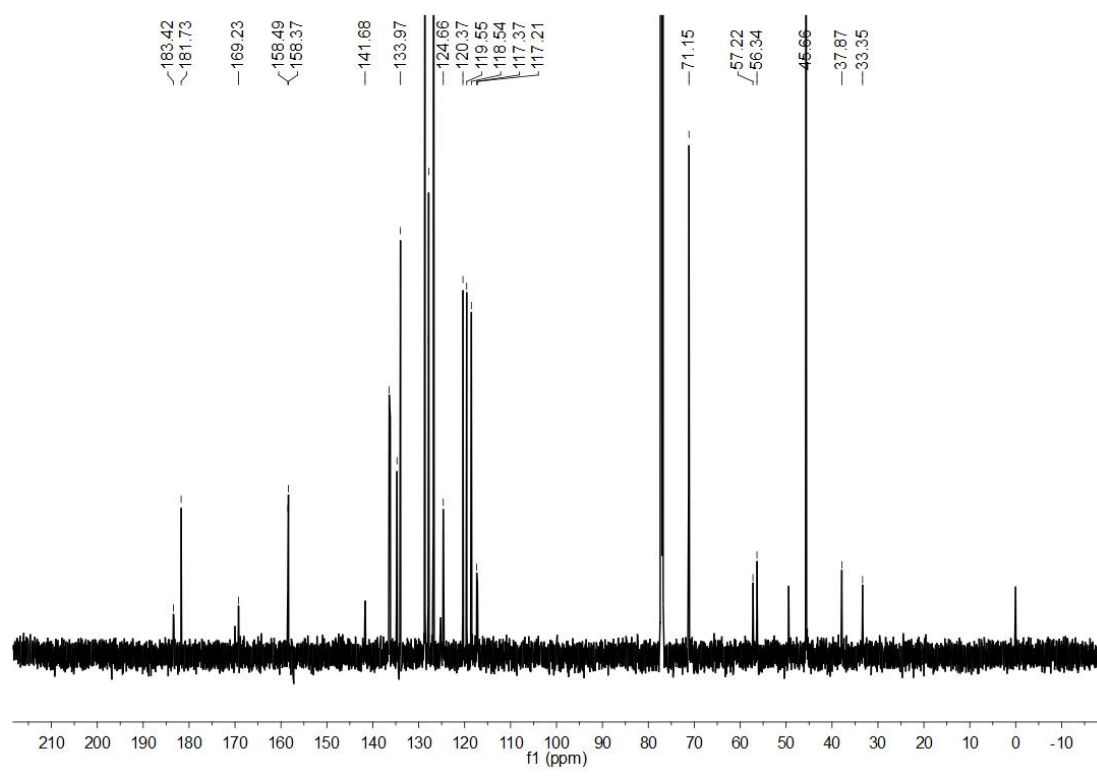

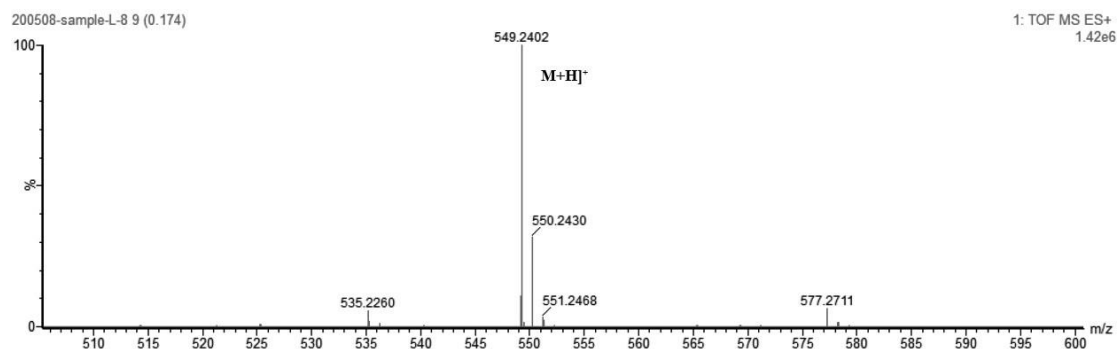

**1,8-di(benzyloxy)-9,10-anthraquinone-N-(2-(ethylamino)ethyl)-3-carboxamide (KA-4i)**

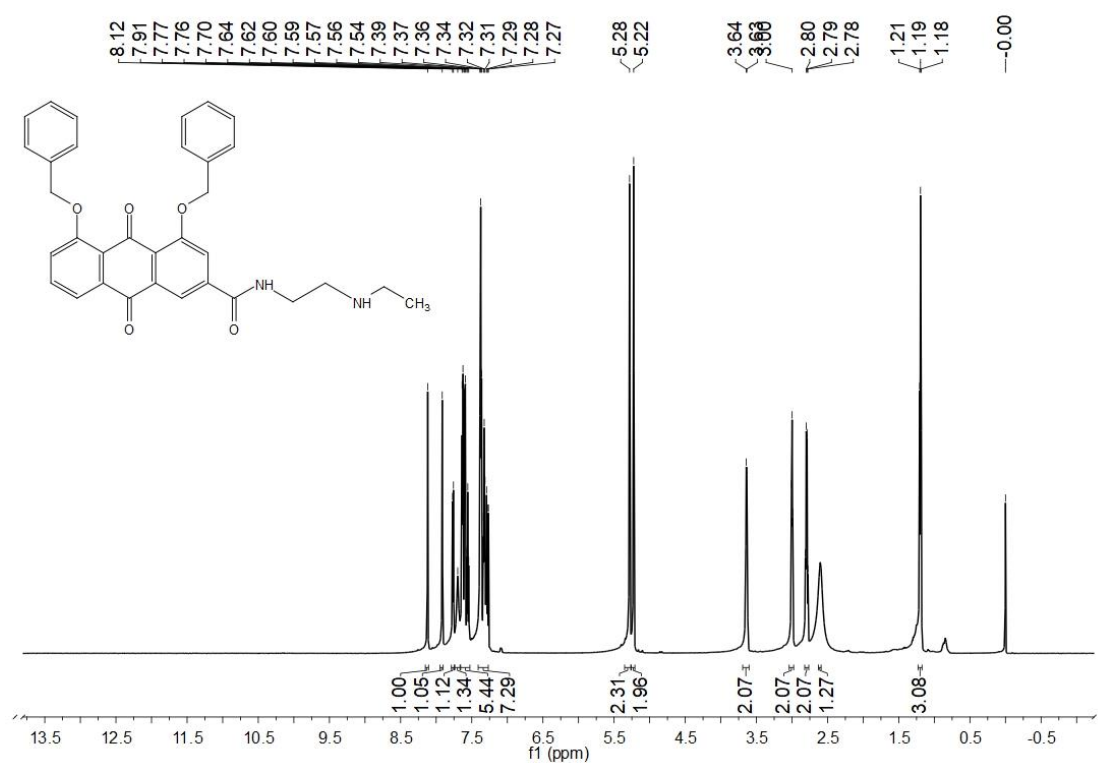

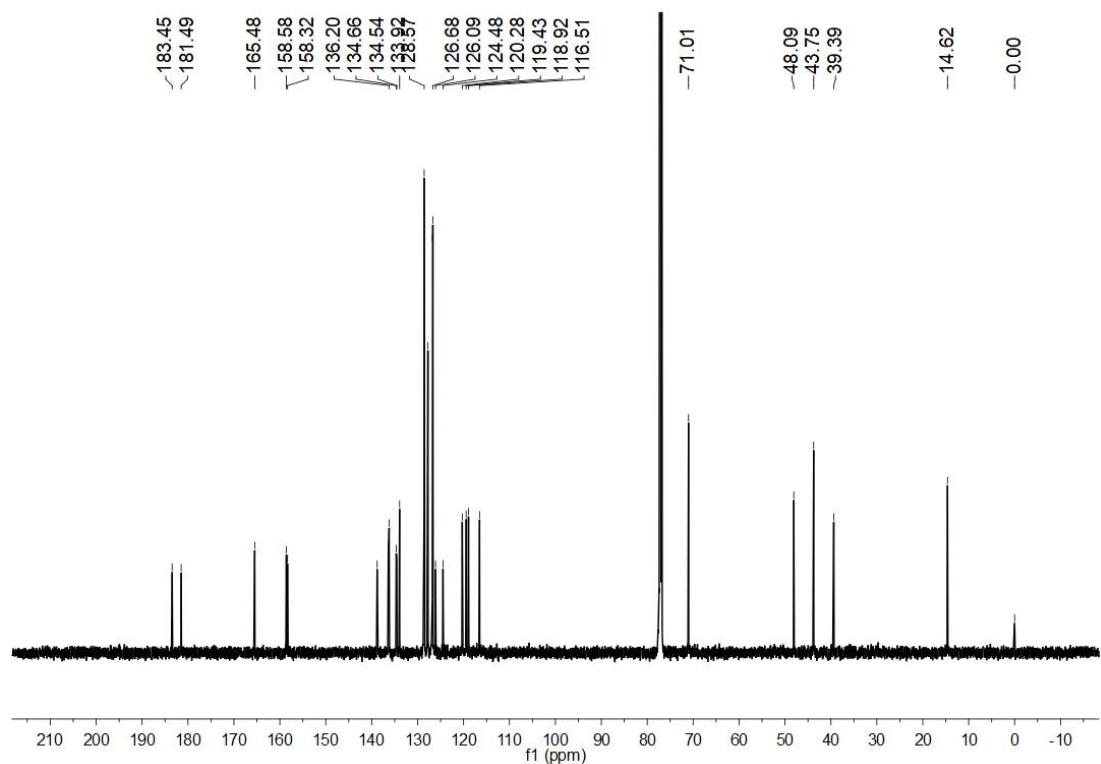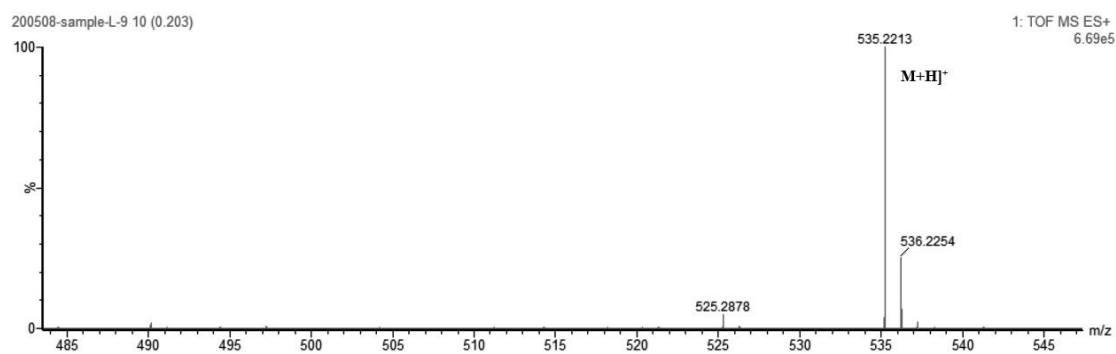

**1,8-di(benzyloxy)-9,10-anthraquinone-N-(2-(phenylamino)ethyl)-3-carboxamide (KA-4j)**

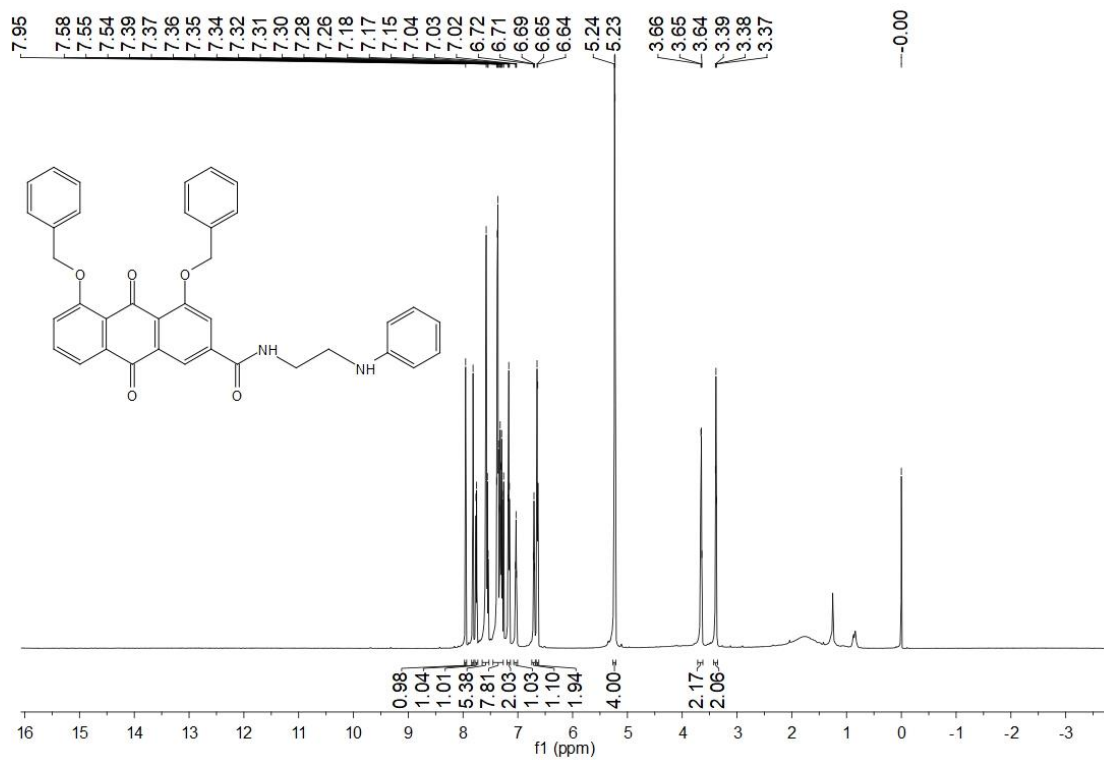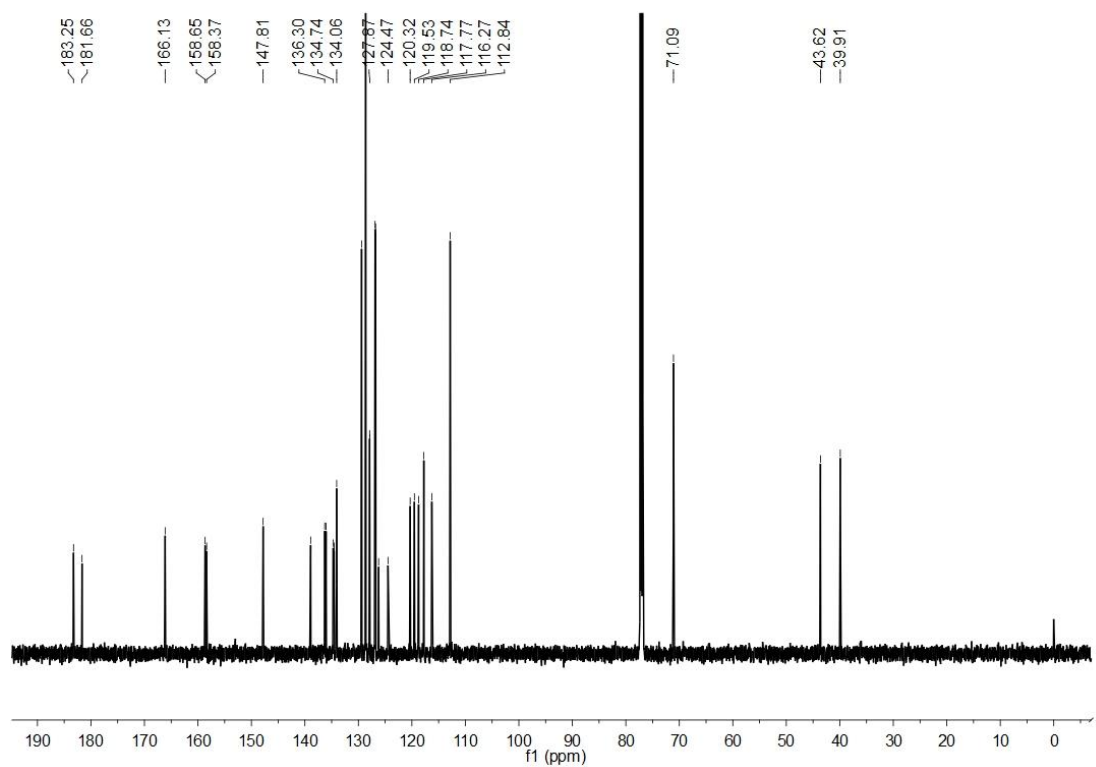

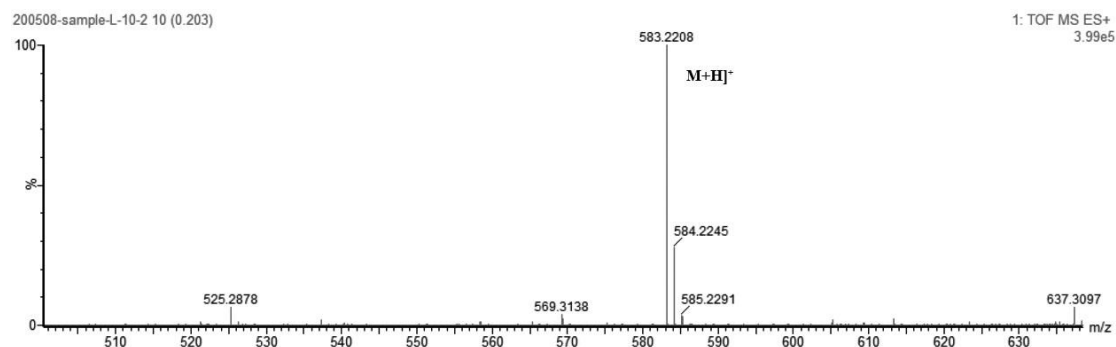

**1,8-di(benzyloxy)-9,10-anthraquinone-N-(2-(piperazin-1-yl)ethyl)-3-carboxamide (KA-4k)**

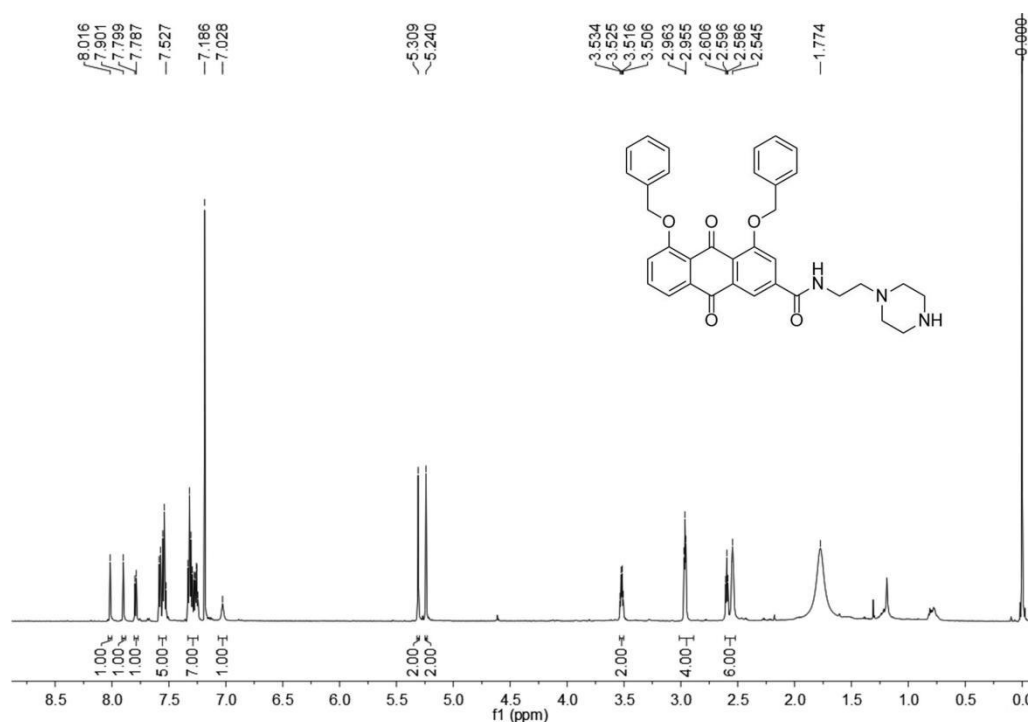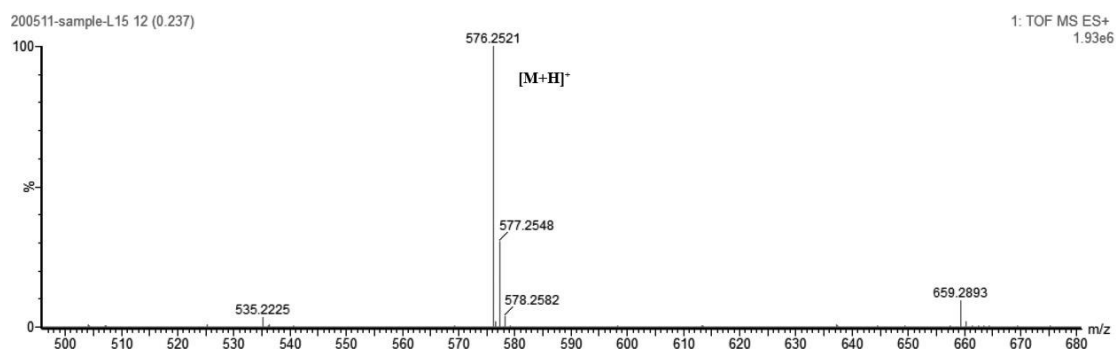

**1,8-di(benzyloxy)-9,10-anthraquinone-N-(3-(dimethylamino)propyl)-3-carboxamide (KA-4l)**

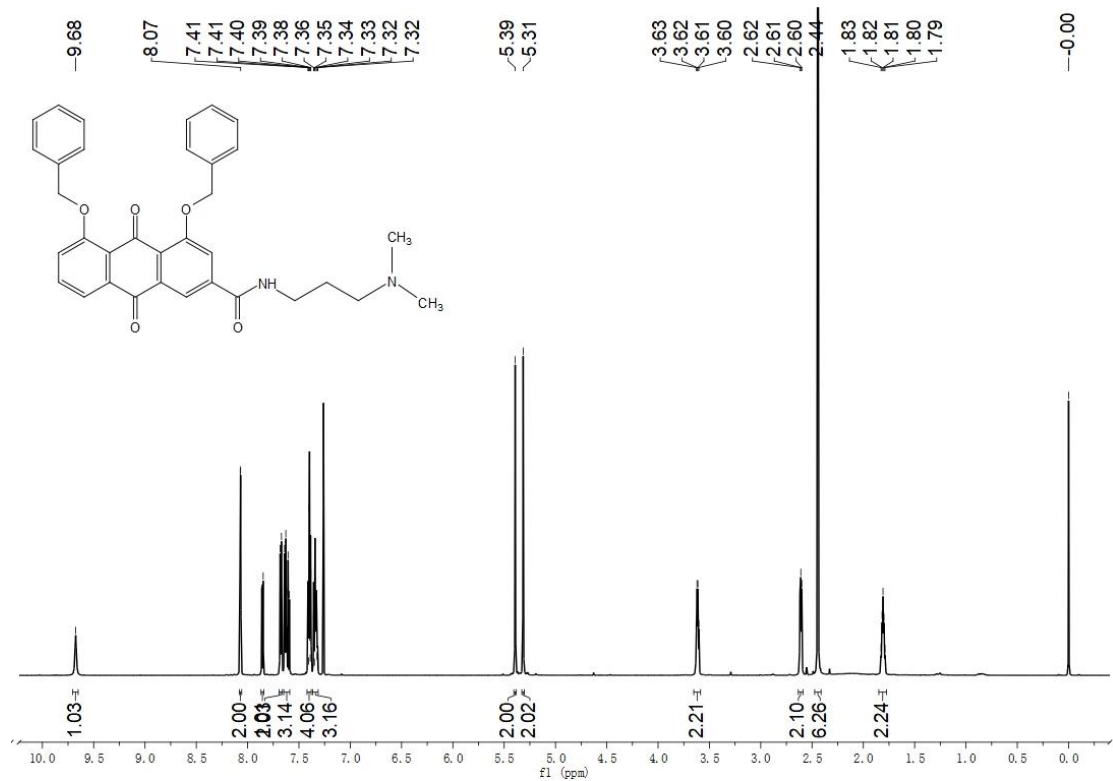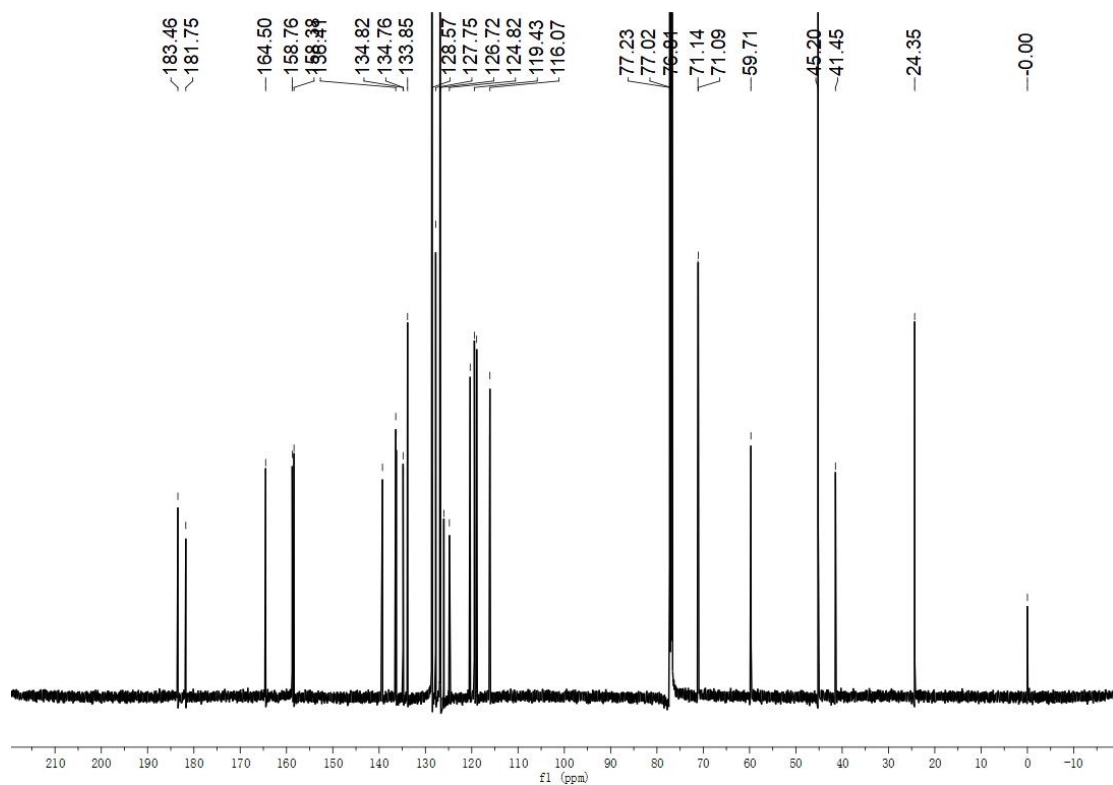

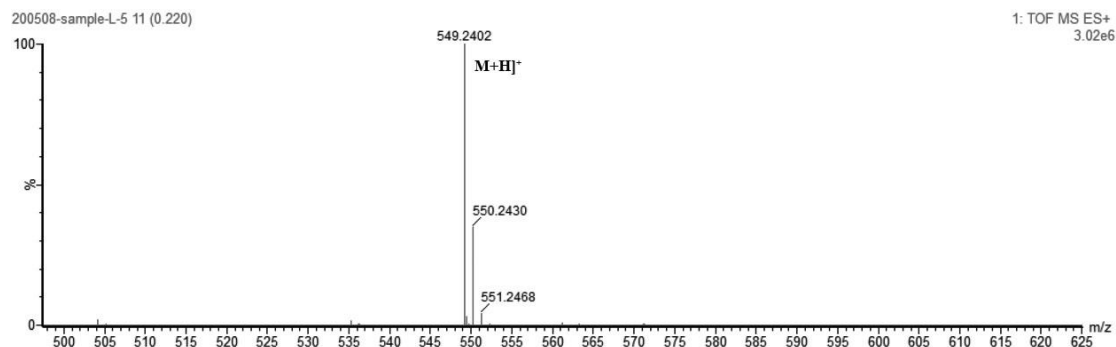

**1,8-di(benzyloxy)-9,10-anthraquinone-N-(3-(diethylamino)propyl)-3-carboxamide (KA-4m)**

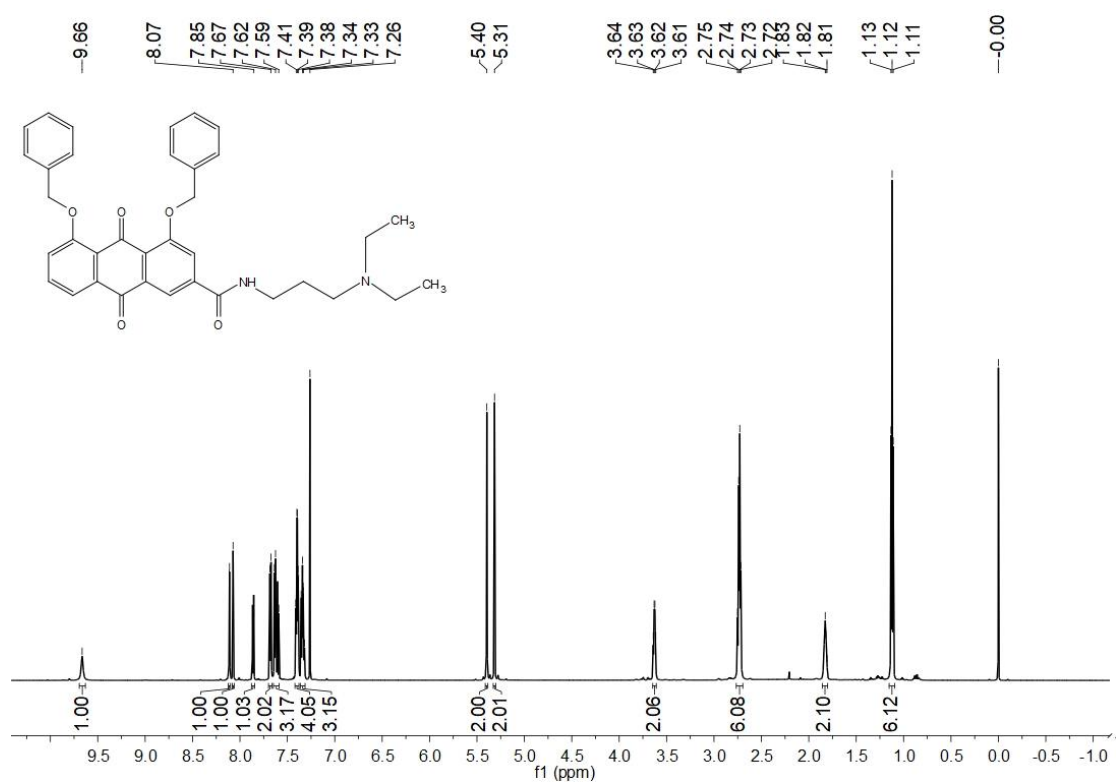

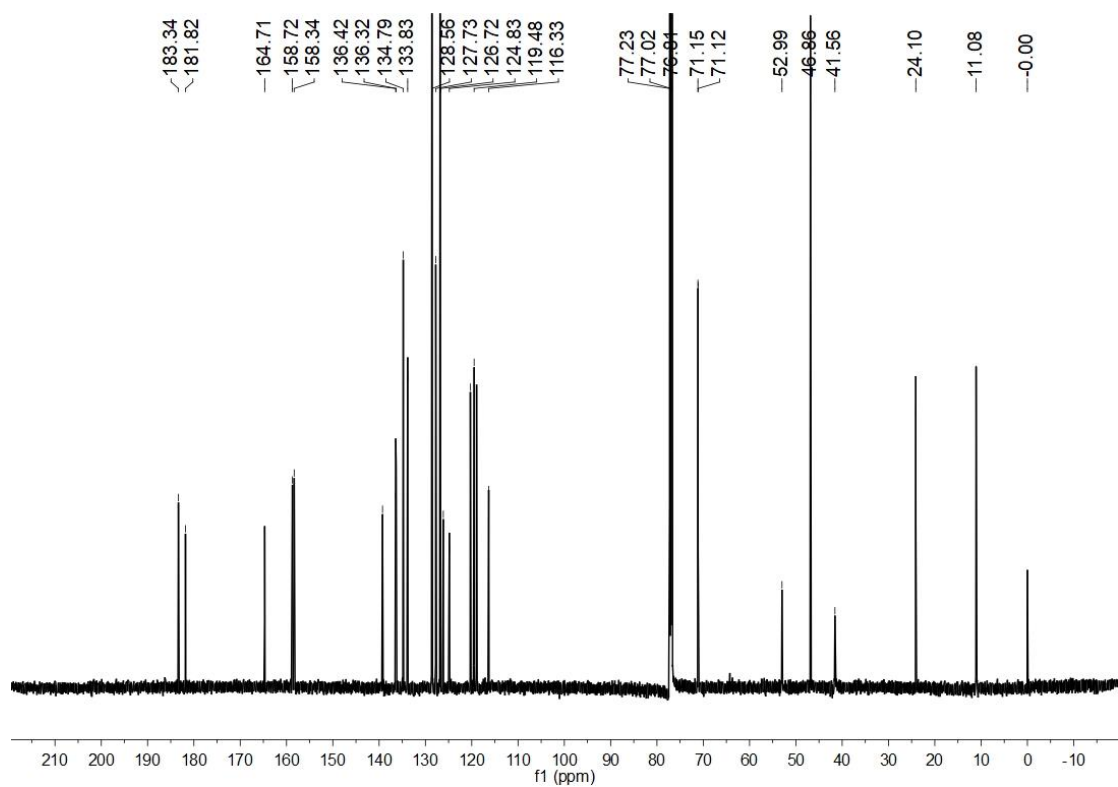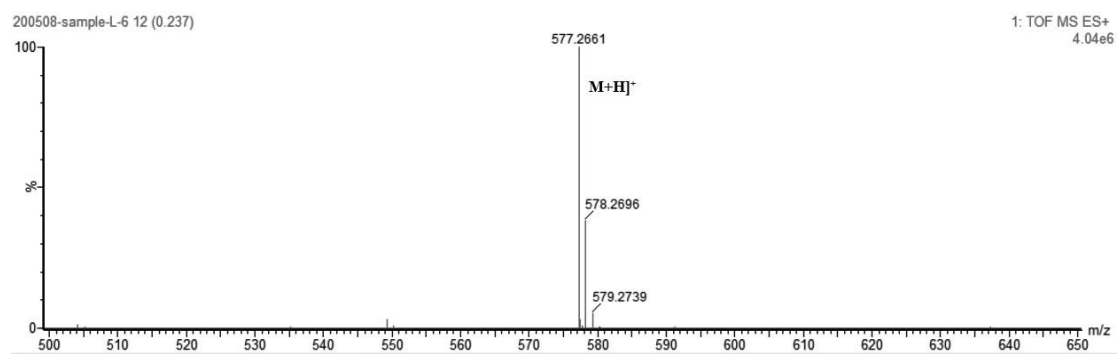

**1,8-di(benzyloxy)-9,10-anthraquinone-N-(3-(pyrrolidin-1-yl)propyl)-3-carboxamide (KA-4n)**



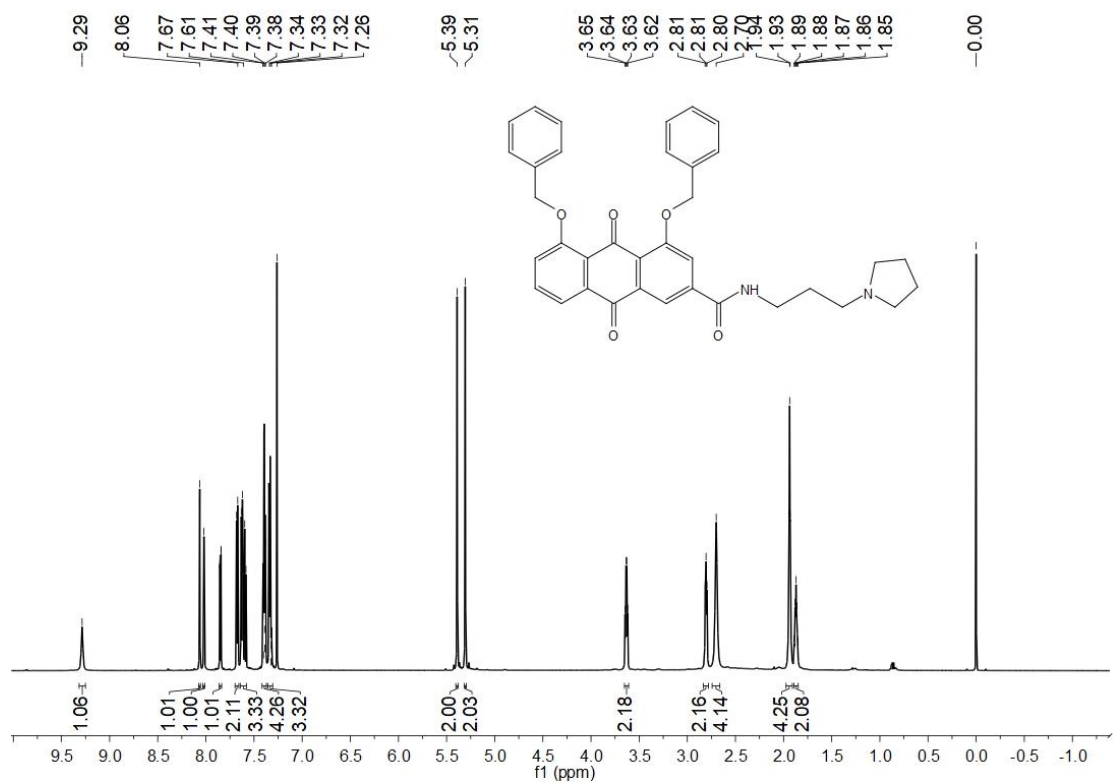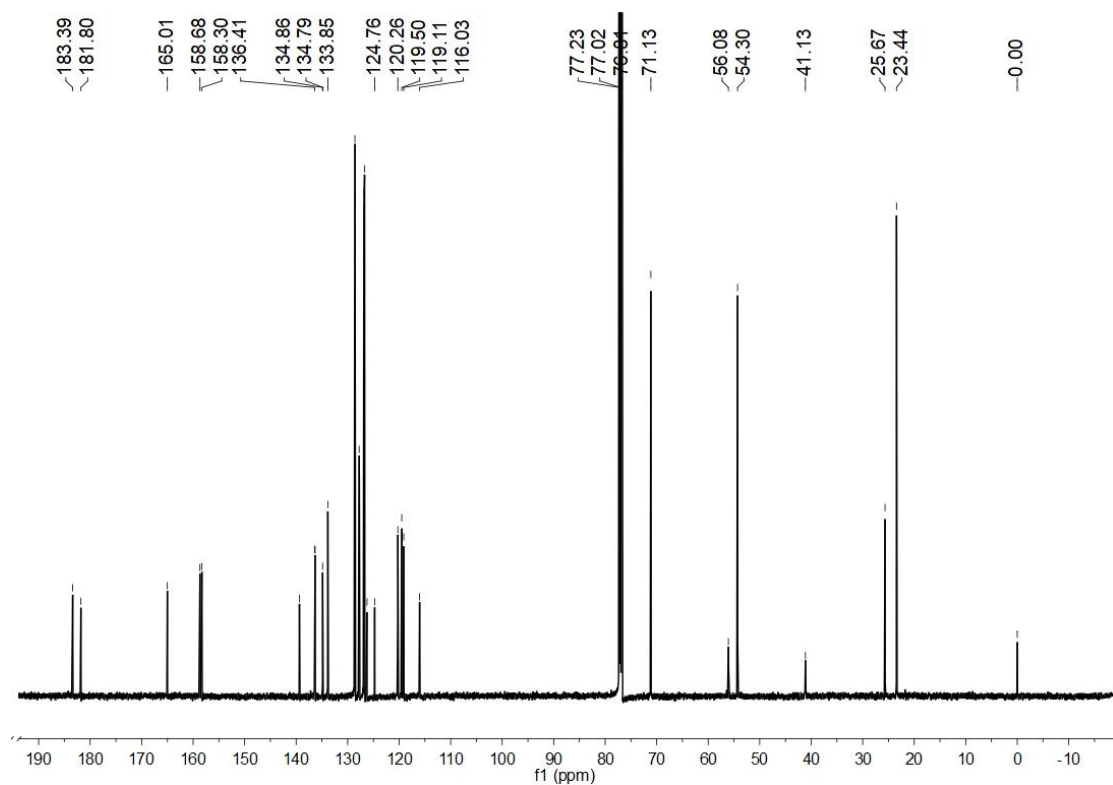

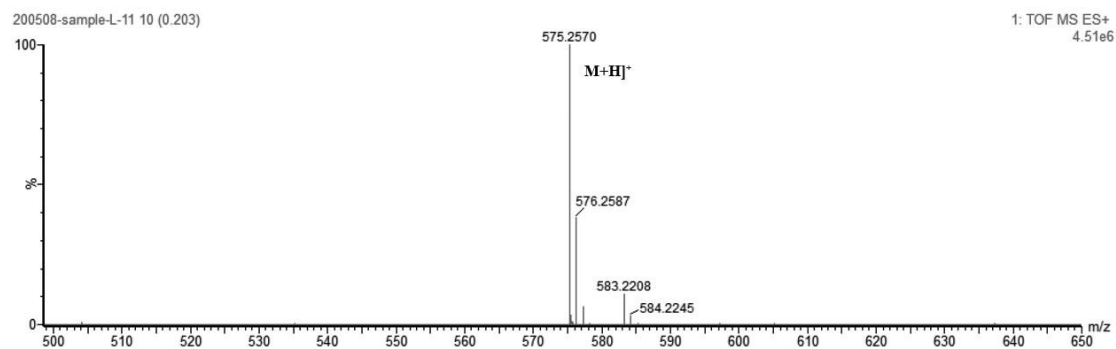

# **1,8-di(benzyloxy)-9,10-anthraquinone-N-(3-morpholinopropyl)-3-carboxamide (KA-4o)**

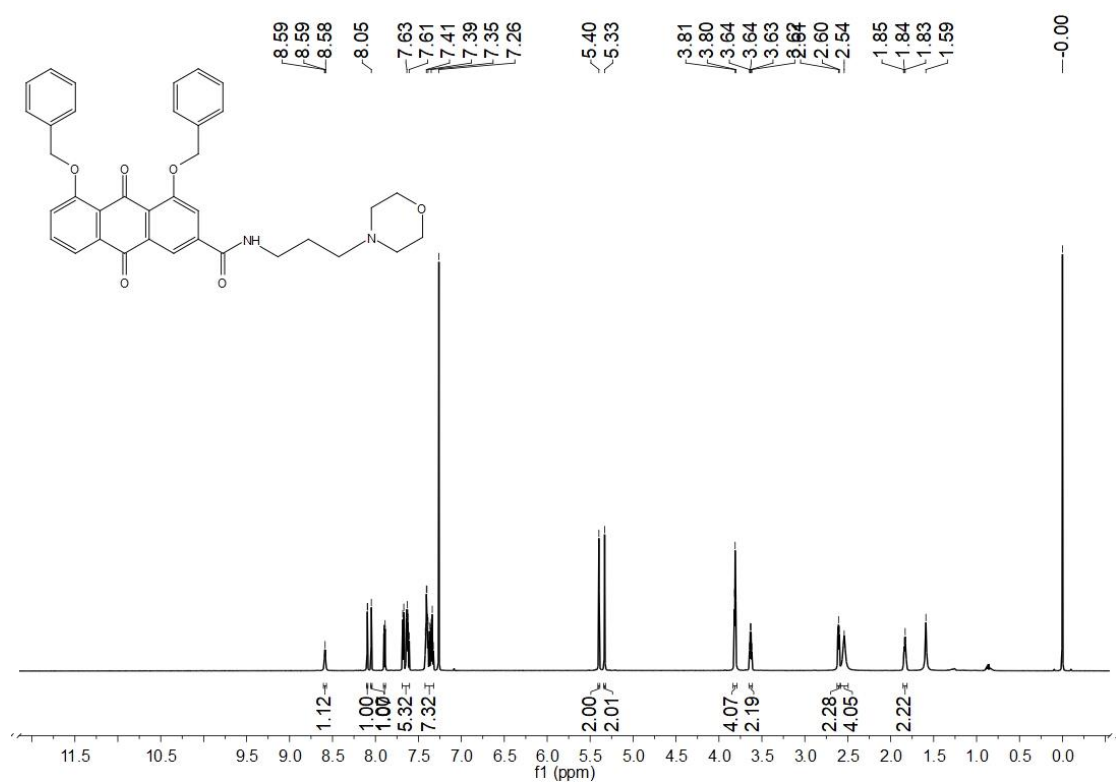

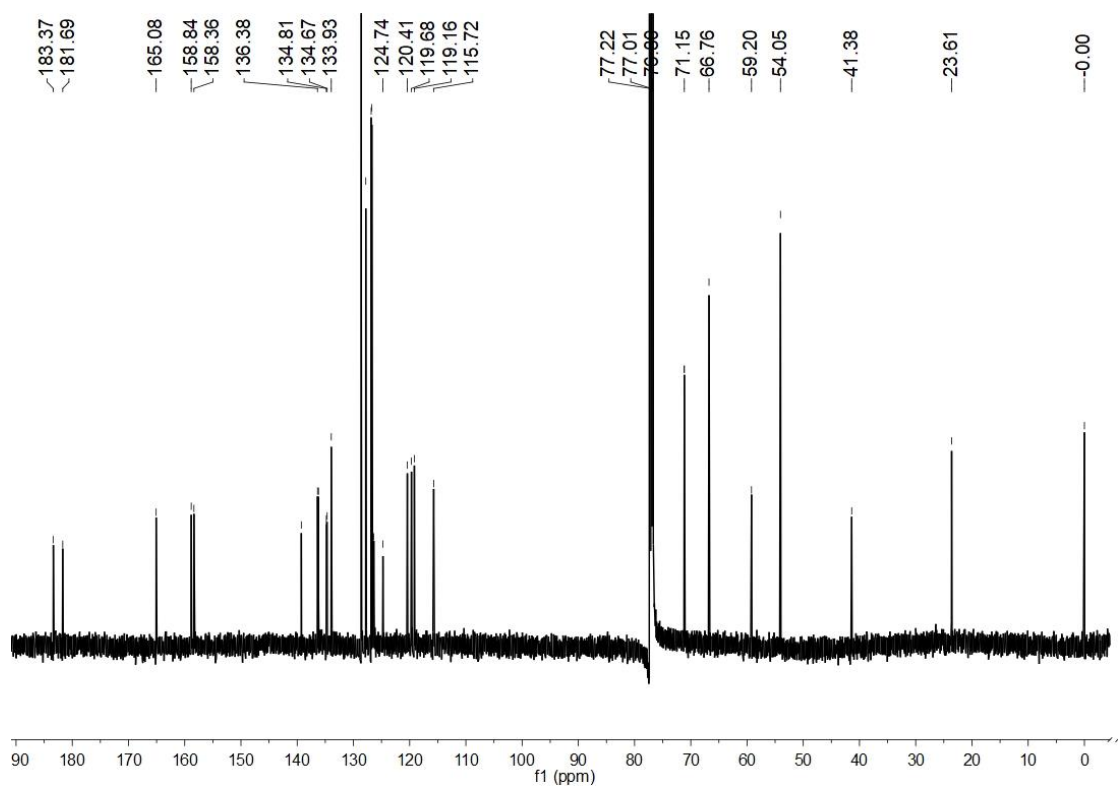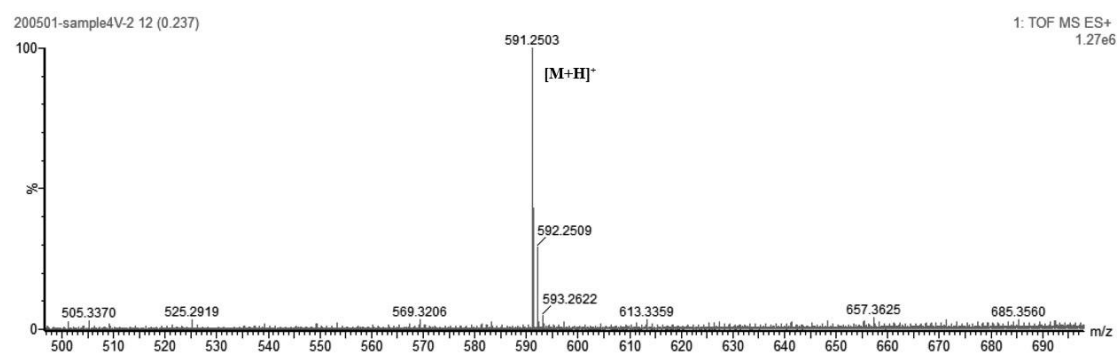

**1,8-di(benzyloxy)-9,10-anthraquinone-N-(2-(methylamino)ethyl)-3-carboxamide (KA-4p)**

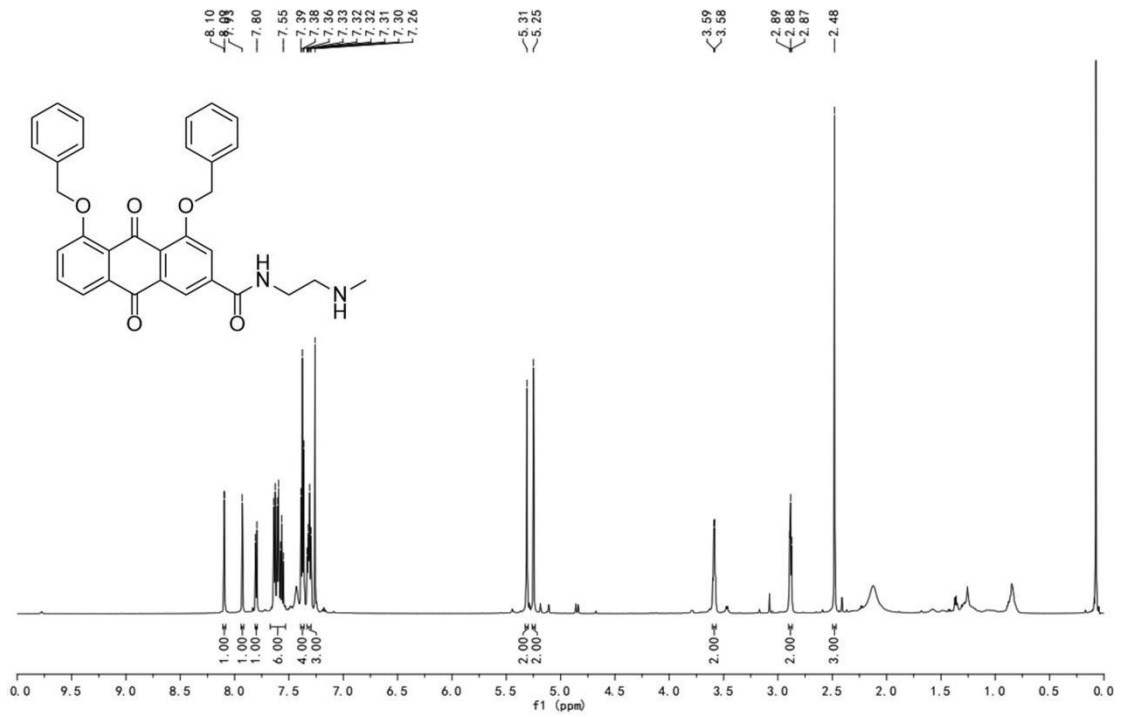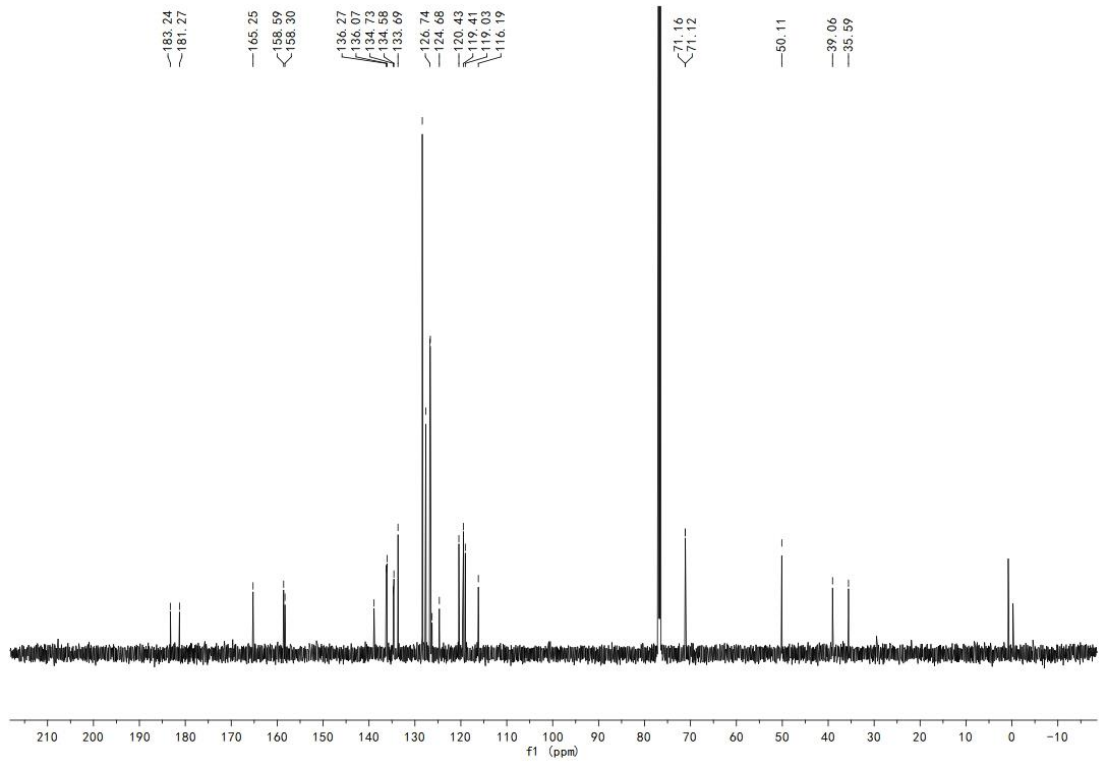

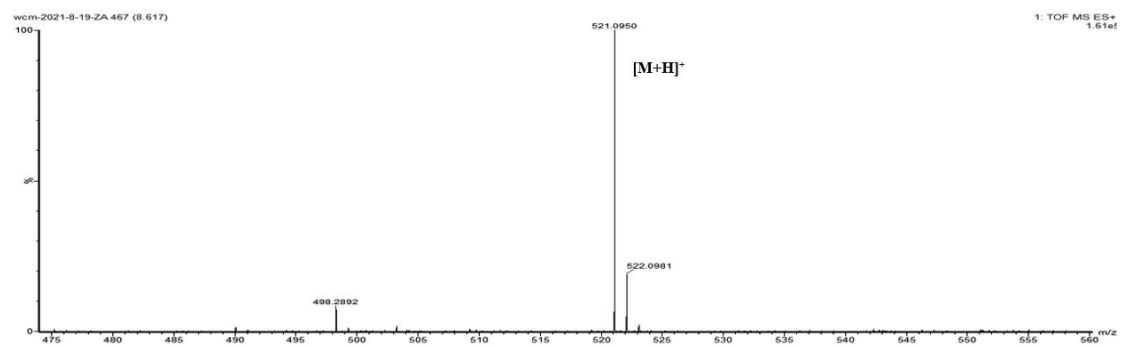

Supplement: Supplementary file 4 [file 1]
